# Supplementary material for: Metabolic pathways variability and sequence/networks comparisons
Source: Springer Nature journal article supplement (doi:10.1186/1471-2105-7-24), 2006-01-18

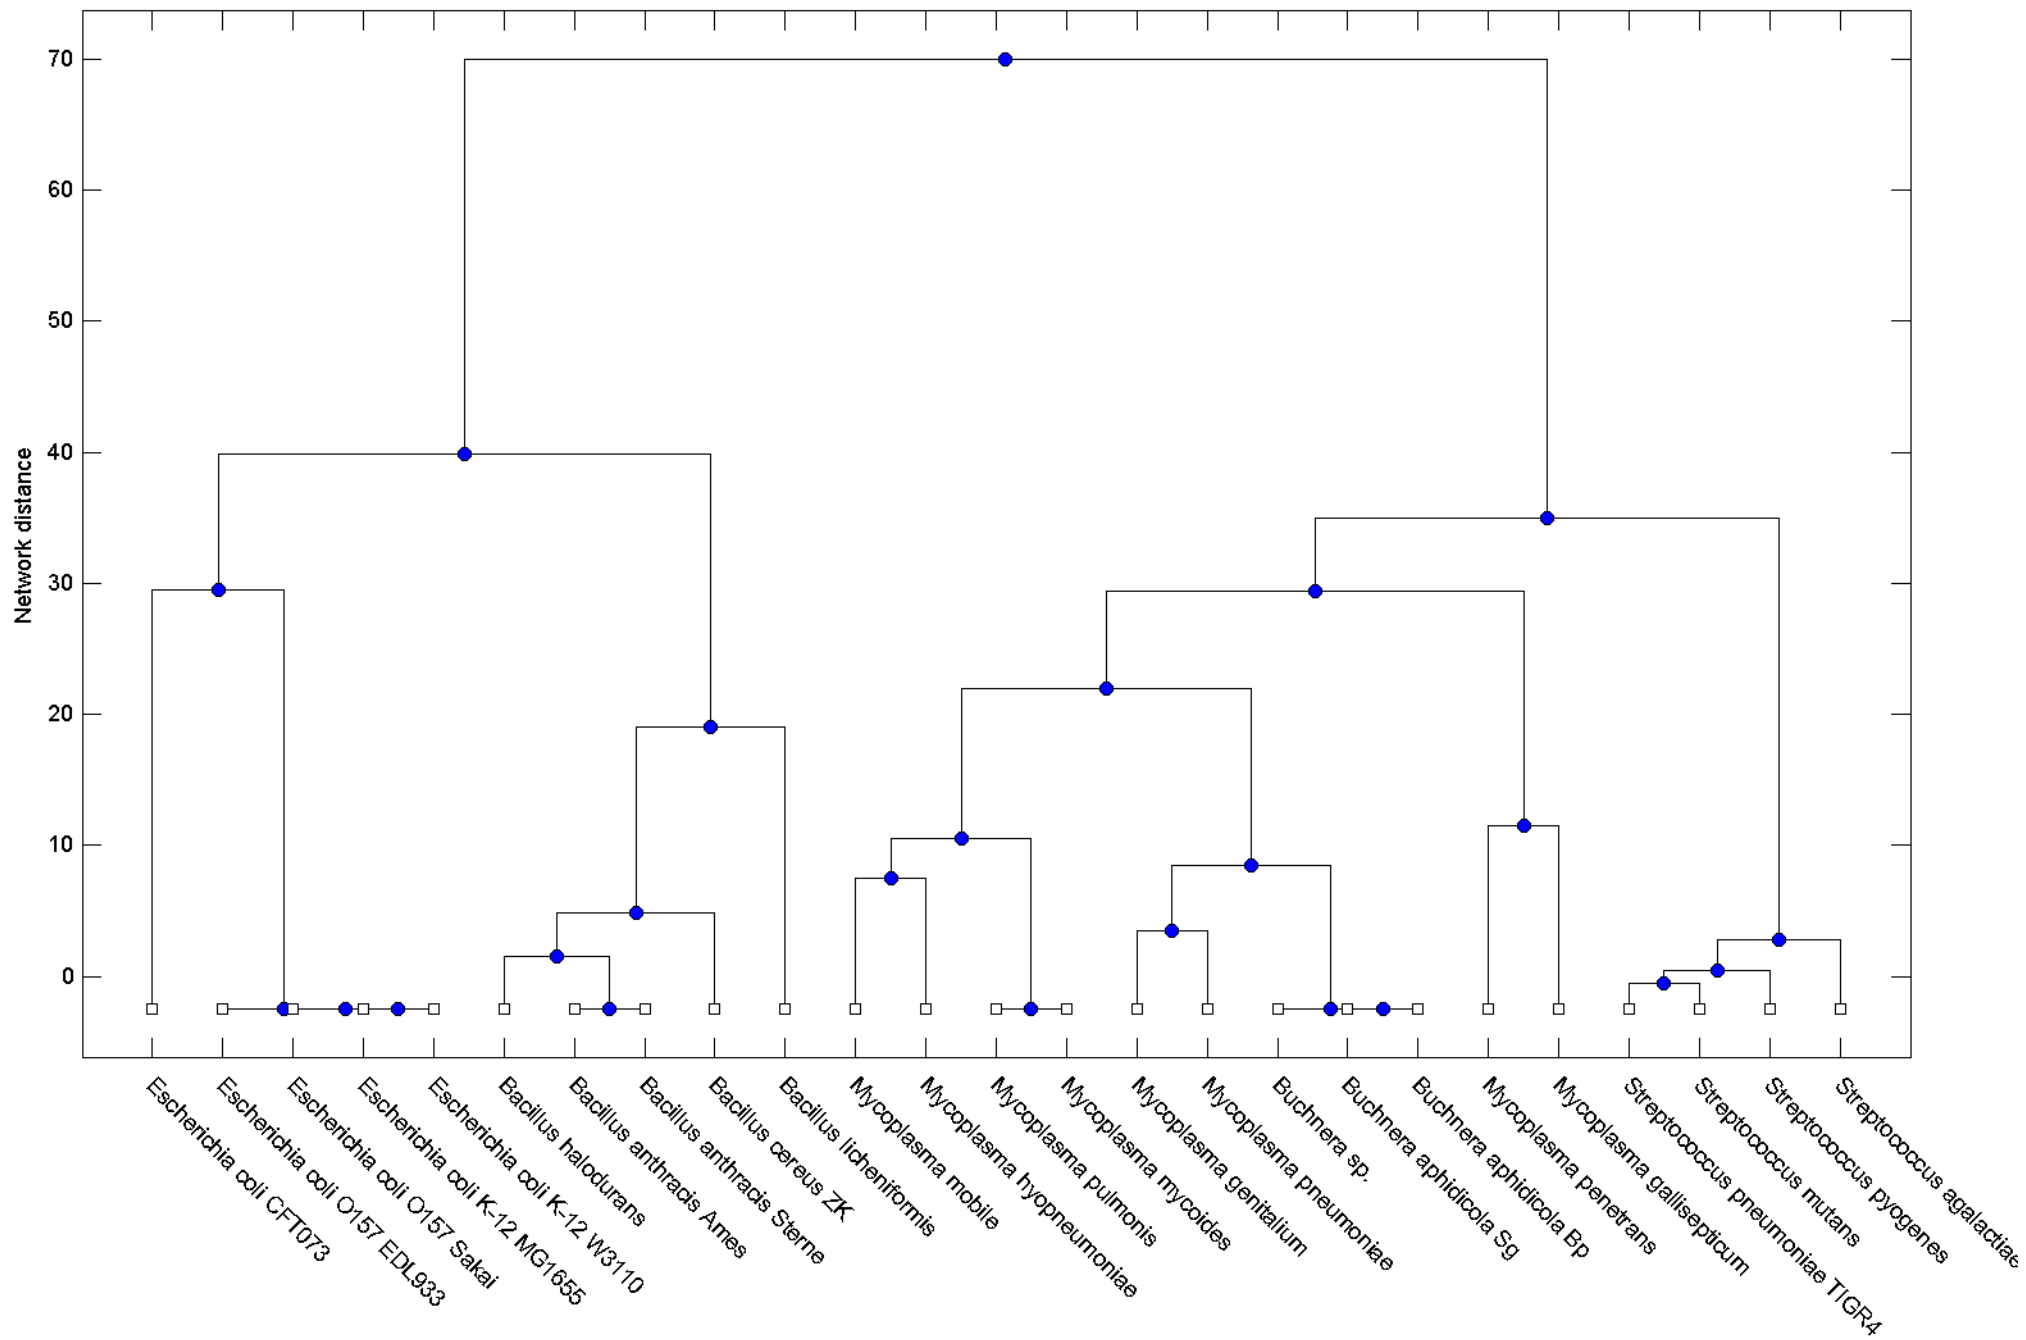

Supplement: Additional file 1 [file 1471-2105-7-24-s1.pdf]
